# Supplementary material for: Complete genome sequence and comparative analysis of a Vibrio vulnificus strain isolated from a clinical patient
Source: Front Microbiol. 2023 Oct 31;14:1240835. doi: 10.3389/fmicb.2023.1240835 (PMC10644004; doi:10.3389/fmicb.2023.1240835)
Supplement: Supplementary file 6 [file Table_6.XLSX]

## Sheet: Sheet1
Table S6. Average nucleotide identity values (front, black font) and digital DNA-DNA Hybridization values (behind, red font) amongst 26 V. vulnificus strains.
	06-2410	07-2444	NBRC 15645 = ATCC 27562	1676-80	2009V-1035	2015AW-0208	2142-77	2497-87	93U204	CMCP6	CECT 4999	Env1	FDAARGOS_119	FDAARGOS_663	FORC_009	FORC_016	FORC_017	FORC_037	FORC_054	FORC_077	MO6-24/O	Vv180806	VV20-8B-2	VV2014DJH	VV2018	YJ016
06-2410	100/100	97.66/77.8	98.68/87.6	95.43/61.5	98.59/86.4	98.55/85.9	95.60/62.8	98.49/85.9	95.41/61.6	95.44/61.9	98.71/87.8	98.68/87.6	95.52/62.4	98.68/87.7	95.34/61.3	95.33/61.3	95.40/61.7	97.51/76.8	98.70/87.7	95.41/61.8	95.45/62.0	95.43/61.6	95.36/61.2	95.43/61.7	95.42/61.8	95.40/61.5
07-2444	97.66/77.8	100/100	97.70/78.1	96.28/67.2	97.63/77.6	97.56/77.0	96.39/68.3	97.53/76.7	96.24/66.8	96.27/67.3	97.67/78.2	97.67/77.8	96.32/68.0	97.70/78.1	96.20/66.7	96.19/66.8	96.21/66.8	97.15/73.2	97.67/78.0	96.25/67.2	96.29/67.7	96.27/67.3	96.19/66.9	96.29/67.4	96.24/67.2	96.28/67.3
NBRC 15645 = ATCC 27562	98.68/87.6	97.70/78.1	100/100	95.52/62.2	98.60/86.4	98.65/87.1	95.74/63.9	98.48/85.6	95.52/62.2	95.53/62.2	98.69/87.9	98.79/88.9	95.67/63.2	99.99/100	95.47/61.7	95.48/61.7	95.55/62.3	97.42/76.1	98.71/87.8	95.52/62.4	95.57/62.7	95.53/62.6	95.49/62.1	95.55/62.5	95.55/62.6	95.53/62.4
1676-80	95.43/61.5	96.28/67.2	95.52/62.2	100/100	95.55/62.4	95.46/61.8	98.13/82.4	95.56/62.4	98.28/84.0	98.27/83.6	95.45/61.6	95.44/61.9	98.15/82.3	95.52/62.2	98.2/82.8	98.19/82.8	98.24/83.3	96.55/69.1	95.40/61.5	98.26/83.8	98.27/83.8	98.26/83.9	98.25/83.6	98.31/83.9	98.21/83.2	98.30/83.9
2009V-1035	98.59/86.4	97.63/77.6	98.60/86.4	95.55/62.4	100/100	98.52/85.8	95.74/63.5	98.46/85.2	95.54/61.9	95.57/62.2	98.62/87.0	98.62/86.8	95.69/63.2	98.60/86.4	95.46/61.6	95.45/61.7	95.53/62.0	97.40/75.8	98.62/86.7	95.54/62.3	95.60/62.6	95.57/62.3	95.51/62.0	95.57/62.3	95.57/62.5	95.53/62.0
2015AW-0208	98.55/85.9	97.56/77.0	98.65/87.1	95.46/61.8	98.52/85.8	100/100	95.71/63.3	98.41/84.5	95.51/61.8	95.49/61.9	98.60/86.1	98.74/87.9	95.62/62.8	98.65/87.1	95.44/61.8	95.44/61.8	95.49/61.9	97.37/75.7	98.59/86.2	95.47/61.8	95.54/62.1	95.48/61.9	95.45/61.4	95.51/61.9	95.47/61.8	95.50/61.9
2142-77	95.60/62.8	96.39/68.3	95.74/63.9	98.13/82.4	95.74/63.5	95.71/63.3	100/100	95.78/63.6	98.17/83.0	98.27/83.9	95.63/63.0	95.67/63.2	98.13/82.6	95.74/63.9	98.10/82.2	98.10/82.3	98.19/83.3	96.63/69.7	95.61/62.7	98.23/83.8	98.25/84.1	98.25/84.0	98.19/83.6	98.29/84.2	98.12/82.8	98.18/83.2
2497-87	98.49/85.9	97.53/76.7	98.48/85.6	95.56/62.4	98.46/85.2	98.41/84.5	95.78/63.6	100/100	95.60/62.3	95.61/62.5	98.53/85.9	98.51/85.7	95.74/63.6	98.47/85.6	95.53/62.2	95.53/62.2	95.62/62.6	97.40/76.0	98.54/86.1	95.59/62.7	95.66/62.8	95.62/62.7	95.53/62.1	95.62/62.6	95.59/62.6	95.62/62.7
93U204	95.41/61.6	96.24/66.8	95.52/62.2	98.28/84.0	95.54/61.9	95.51/61.8	98.17/83.0	95.60/62.3	100/100	98.40/85.1	95.43/61.5	95.47/61.9	98.27/83.4	95.53/62.2	98.21/83.0	98.22/83.1	98.34/84.5	96.60/69.2	95.41/61.4	98.34/85.0	98.34/84.8	98.35/84.8	98.28/84.2	98.41/85.4	98.22/83.5	98.35/84.7
CMCP6	95.44/61.9	96.27/67.3	95.53/62.2	98.27/83.6	95.57/62.2	95.49/61.9	98.27/83.9	95.61/62.5	98.40/85.1	100/100	95.44/61.7	95.49/62.0	98.37/84.6	95.53/62.2	98.21/83.5	98.21/83.5	98.59/86.8	96.86/71.1	95.43/61.5	98.61/87.5	98.47/86.2	98.37/85.0	98.44/86.2	98.55/86.6	98.39/85.2	98.34/84.6
CECT 4999	98.71/87.8	97.67/78.2	98.69/87.9	95.45/61.6	98.62/87.0	98.60/86.1	95.63/63.0	98.53/85.9	95.43/61.5	95.44/61.7	100/100	98.72/88.0	95.55/62.6	98.70/88.0	95.38/61.1	95.38/61.2	95.42/61.5	97.40/76.1	98.85/89.2	95.43/61.8	95.50/62.1	95.45/61.9	95.38/61.4	95.46/61.8	95.45/61.9	95.43/61.4
Env1	98.68/87.6	97.67/77.8	98.79/88.9	95.44/61.9	98.62/86.8	98.74/87.9	95.67/63.2	98.51/85.7	95.47/61.9	95.49/62.0	98.72/88.0	100/100	95.56/62.6	98.80/88.9	95.41/61.5	95.41/61.6	95.48/61.9	97.44/76.3	98.72/87.9	95.46/61.9	95.50/62.2	95.48/62.0	95.43/61.5	95.48/62.0	95.51/62.2	95.46/61.8
FDAARGOS_119	95.52/62.4	96.32/68.0	95.67/63.2	98.15/82.3	95.69/63.2	95.62/62.8	98.13/82.6	95.74/63.6	98.27/83.4	98.37/84.6	95.55/62.6	95.56/62.6	100/100	95.66/63.2	98.14/82.5	98.14/82.5	98.28/83.6	96.66/69.8	95.53/62.2	98.31/84.0	98.38/84.7	98.27/83.9	98.26/83.9	98.44/85.5	98.22/83.4	98.23/83.3
FDAARGOS_663	98.68/87.7	97.70/78.1	99.99/100	95.52/62.2	98.60/86.4	98.65/87.1	95.74/63.9	98.47/85.6	95.53/62.2	95.53/62.2	98.70/88.0	98.80/88.9	95.66/63.2	100/100	95.48/61.7	95.48/61.7	95.54/62.3	97.42/76.2	98.70/87.8	95.53/62.4	95.58/62.7	95.53/62.5	95.50/62.1	95.54/62.5	95.55/62.6	95.53/62.3
FORC_009	95.34/61.3	96.20/66.7	95.47/61.7	98.20/82.8	95.46/61.6	95.44/61.8	98.10/82.2	95.53/62.2	98.21/83.0	98.21/83.5	95.38/61.1	95.41/61.5	98.14/82.5	95.48/61.7	100/100	100/100	98.21/83.2	96.54/68.8	95.35/61.0	98.23/83.5	98.21/83.4	98.19/83.1	98.17/83.0	98.25/83.6	98.31/84.4	98.25/83.5
FORC_016	95.33/61.3	96.19/66.8	95.48/61.7	98.19/82.8	95.45/61.7	95.44/61.8	98.10/82.3	95.53/62.2	98.22/83.1	98.21/83.5	95.38/61.2	95.41/61.6	98.14/82.5	95.48/61.7	100/100	100/100	98.21/83.2	96.54/68.9	95.36/61.0	98.23/83.6	98.21/83.4	98.19/83.1	98.17/83.0	98.25/83.6	98.32/84.4	98.25/83.5
FORC_017	95.40/61.7	96.21/66.8	95.55/62.3	98.24/83.3	95.53/62.0	95.49/61.9	98.19/83.3	95.62/62.6	98.34/84.5	98.59/86.8	95.42/61.5	95.48/61.9	98.28/83.6	95.54/62.3	98.21/83.2	98.21/83.2	100/100	96.99/72.1	95.42/61.4	98.60/87.4	98.42/85.3	98.34/84.5	98.34/84.7	98.48/85.9	98.45/85.8	98.34/84.2
FORC_037	97.51/76.8	97.15/73.2	97.42/76.1	96.55/69.1	97.40/75.8	97.37/75.7	96.63/69.7	97.40/76.0	96.60/69.2	96.86/71.1	97.40/76.1	97.44/76.3	96.66/69.8	97.42/76.2	96.54/68.8	96.54/68.9	96.99/72.1	100/100	97.42/75.7	96.83/71.1	96.62/69.6	96.60/69.3	96.61/69.3	96.67/69.7	96.75/70.5	96.61/69.4
FORC_054	98.70/87.7	97.67/78.0	98.71/87.8	95.40/61.5	98.62/86.7	98.59/86.2	95.61/62.7	98.54/86.1	95.41/61.4	95.43/61.5	98.85/89.2	98.72/87.9	95.53/62.2	98.70/87.8	95.35/61.0	95.36/61.0	95.42/61.4	97.42/75.7	100/100	95.42/61.5	95.48/61.9	95.42/61.4	95.37/61.2	95.43/61.6	95.41/61.6	95.43/61.4
FORC_077	95.41/61.8	96.25/67.2	95.52/62.4	98.26/83.8	95.54/62.3	95.47/61.8	98.23/83.8	95.59/62.7	98.34/85.0	98.61/87.5	95.43/61.8	95.46/61.9	98.31/84.0	95.53/62.4	98.23/83.5	98.23/83.6	98.60/87.4	96.83/71.1	95.42/61.5	100/100	98.45/86.0	98.38/85.2	98.39/85.6	98.49/86.2	98.41/85.6	98.34/84.9
MO6-24/O	95.45/62.0	96.29/67.7	95.57/62.7	98.27/83.8	95.60/62.6	95.54/62.1	98.25/84.1	95.66/62.8	98.34/84.8	98.47/86.2	95.50/62.1	95.50/62.2	98.38/84.7	95.58/62.7	98.21/83.4	98.21/83.4	98.42/85.3	96.62/69.6	95.48/61.9	98.45/86.0	100/100	98.38/85.2	98.39/85.6	98.51/86.2	98.29/84.4	98.35/84.9
Vv180806	95.43/61.6	96.27/67.3	95.53/62.6	98.26/83.9	95.57/62.3	95.48/61.9	98.25/84.0	95.62/62.7	98.35/84.8	98.37/85.0	95.45/61.9	95.48/62.0	98.27/83.9	95.53/62.5	98.19/83.1	98.19/83.1	98.34/84.5	96.60/69.3	95.42/61.4	98.38/85.2	98.38/85.2	100/100	98.31/84.5	98.43/85.8	98.25/84.0	98.32/84.3
VV20-8B-2	95.36/61.2	96.19/66.9	95.49/62.1	98.25/83.6	95.51/62.0	95.45/61.4	98.19/83.6	95.53/62.1	98.28/84.2	98.44/86.2	95.38/61.4	95.43/61.5	98.26/83.9	95.50/62.1	98.17/83.0	98.17/83.0	98.34/84.7	96.61/69.3	95.37/61.2	98.39/85.6	98.39/85.6	98.31/84.5	100/100	98.39/85.6	98.20/83.7	98.32/84.5
VV2014DJH	95.43/61.7	96.29/67.4	95.55/62.5	98.31/83.9	95.57/62.3	95.51/61.9	98.29/84.2	95.62/62.6	98.41/85.4	98.55/86.6	95.46/61.8	95.48/62.0	98.44/85.5	95.54/62.5	98.25/83.6	98.25/83.6	98.48/85.9	96.67/69.7	95.43/61.6	98.49/86.2	98.51/86.2	98.43/85.8	98.39/85.6	100/100	98.34/84.8	98.35/84.9
VV2018	95.42/61.8	96.24/67.2	95.55/62.6	98.21/83.2	95.57/62.5	95.47/61.8	98.12/82.8	95.59/62.6	98.22/83.5	98.39/85.2	95.45/61.9	95.51/62.2	98.22/83.4	95.55/62.6	98.31/84.4	98.32/84.4	98.45/85.8	96.75/70.5	95.41/61.6	98.41/85.6	98.29/84.4	98.25/84.0	98.20/83.7	98.34/84.8	100/100	98.22/83.5
YJ016	95.40/61.5	96.28/67.3	95.53/62.4	98.30/83.9	95.53/62.0	95.50/61.9	98.18/83.2	95.62/62.7	98.35/84.7	98.34/84.6	95.43/61.4	95.46/61.8	98.23/83.3	95.53/62.3	98.25/83.5	98.25/83.5	98.34/84.2	96.61/69.4	95.43/61.4	98.34/84.9	98.35/84.9	98.32/84.3	98.32/84.5	98.35/84.9	98.22/83.5	100/100
